# Supplementary material
Source: PubMed Central journal article supplement (PMC3608810)
Supplement: NIHMS439440-supplement-2.pdf [file NIHMS439440-supplement-2.pdf]

### Supplemental figure 1

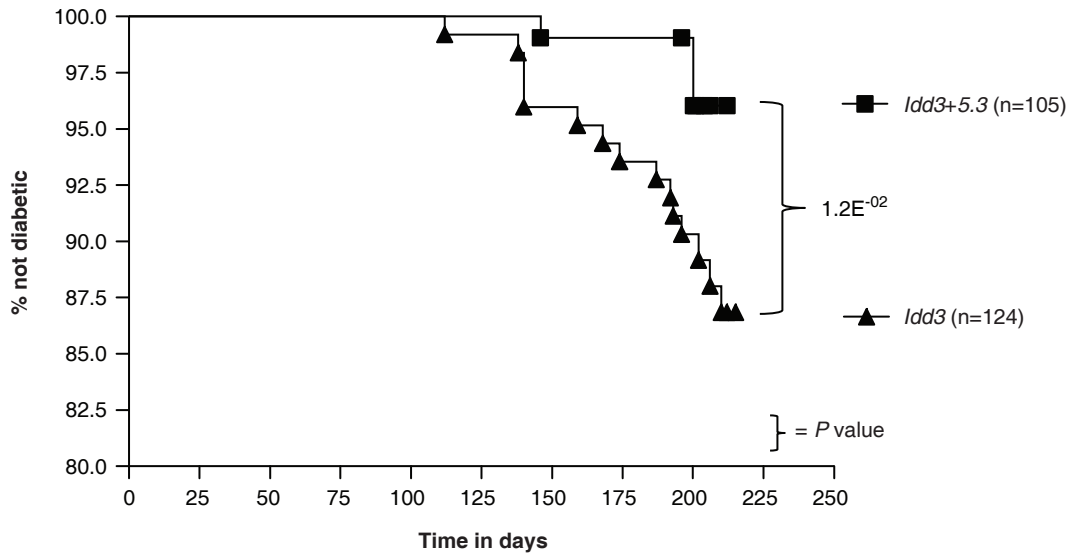

**Supplemental Figure 1.** Combined-analysis of the disease frequencies of two congenic *Idd3+5.3* strains and their respective control *Idd3* strain. The *P* values were calculated by comparing the Kaplan-Meier survival curves of the indicated strains using the log-rank test. The diabetes frequency study on *Idd3+5.3* (Line 6259) and its contemporaneous control *Idd3* (Line 1098) were conducted at Merck Research Laboratories; the diabetes frequency study on *Idd3+5.3* (Line 9246) and its contemporaneous control *Idd3* (Line 1098) were conducted at Taconic.
