# Supplementary material
Source: PubMed Central journal article supplement (PMC3608810)
Supplement: NIHMS439440-supplement-3.pdf [file NIHMS439440-supplement-3.pdf]

## Supplemental figure 2

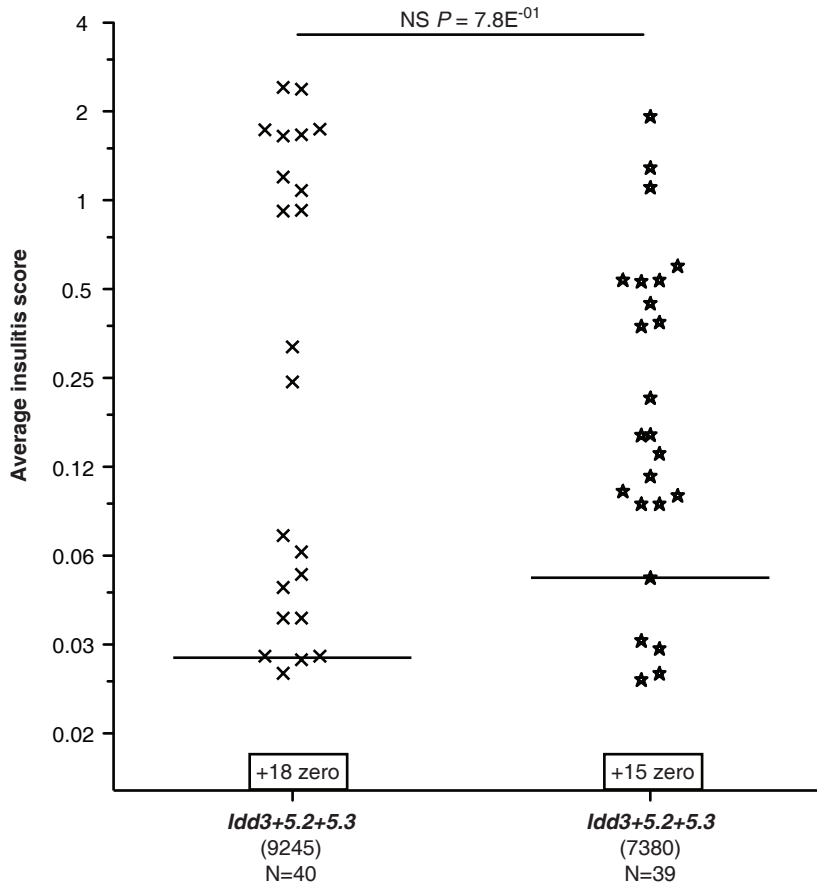

**Supplemental Figure 2.** The occurrence and the severity of insulinitis of two congenic *Idd3+5.2+5.3* strains were similar. Non-diabetic females at 196 days of age were sacrificed and insulinitis scored. For each group, the number (X) of pancreases that have an average insulinitis score of zero was indicated on top of the x-axis and written as '+ (X) zero', because of the Log<sub>2</sub> scale on the y-axis. Horizontal lines on the graph depict median values. Each pair of strains is compared using Mann-Whitney U test. NS, not significant,  $p$ -value  $\geq 0.05$ .
