# Supplementary material
Source: PubMed Central journal article supplement (PMC3608810)
Supplement: NIHMS439440-supplement-4.pdf [file NIHMS439440-supplement-4.pdf]

### Supplemental figure 3

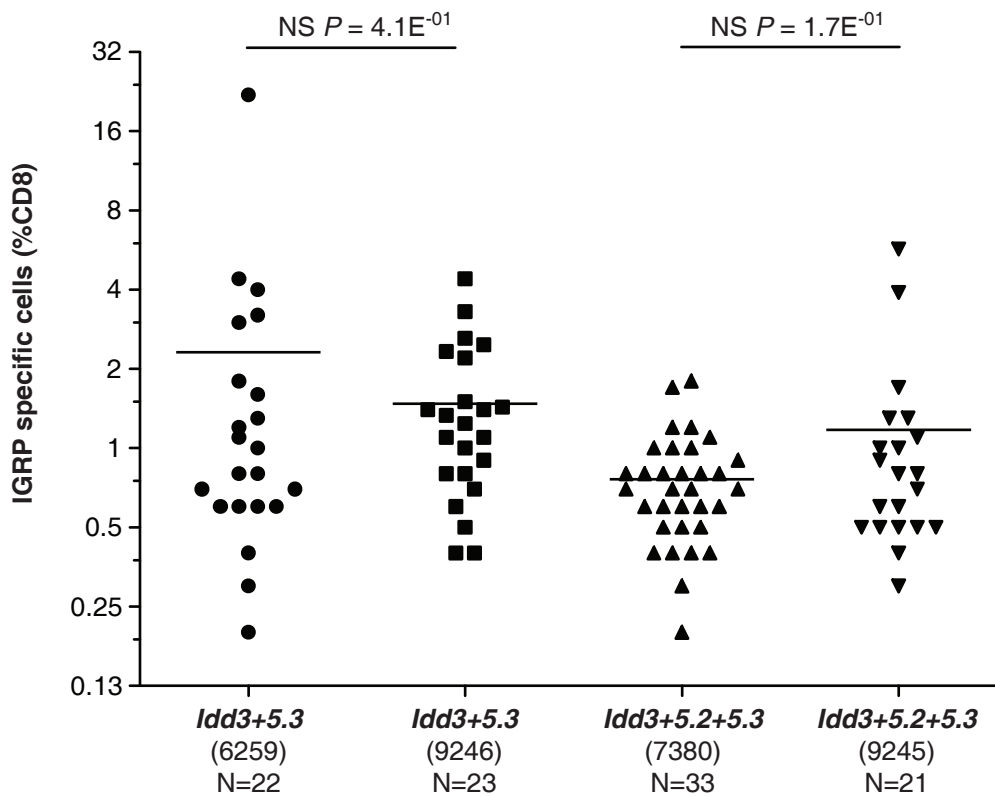

**Supplemental Figure 3.** Two *Idd3+5.3* congenic strains, as well as two *Idd3+5.2+5.3* congenic strains, showed similar percentage of IGRP specific CD8<sup>+</sup> T cells. Female 10-14 week old mice were infected with Vac-KdIGRP. One week later, spleens were harvested and analyzed by FACS for CD8<sup>+</sup> IGRP-tetramer<sup>+</sup> cells. Results were compiled from 8 independent experiments with 4-8 mice per strain. Horizontal lines depict means. Pairs of strains were compared using unpaired t-test with Welch's correction. NS, not significant,  $p$ -value  $\geq 0.05$ .
